# Supplementary material for: Blood Donors’ Age, Haemoglobin Type, G6PD Status, and Blood Group Impact Storability of CPDA-1 Banked Whole Blood: A Repeated-Measure Cohort Study in Cape Coast, Ghana
Source: Hindawi journal article supplement (doi:10.1155/2020/4959518), 2020-05-30
Supplement: f1 [file 4959518.f1.pdf]

## Supplementary data

### Supplementary figure S1: Line graph showing the changes storage lesions with respect to days in storage

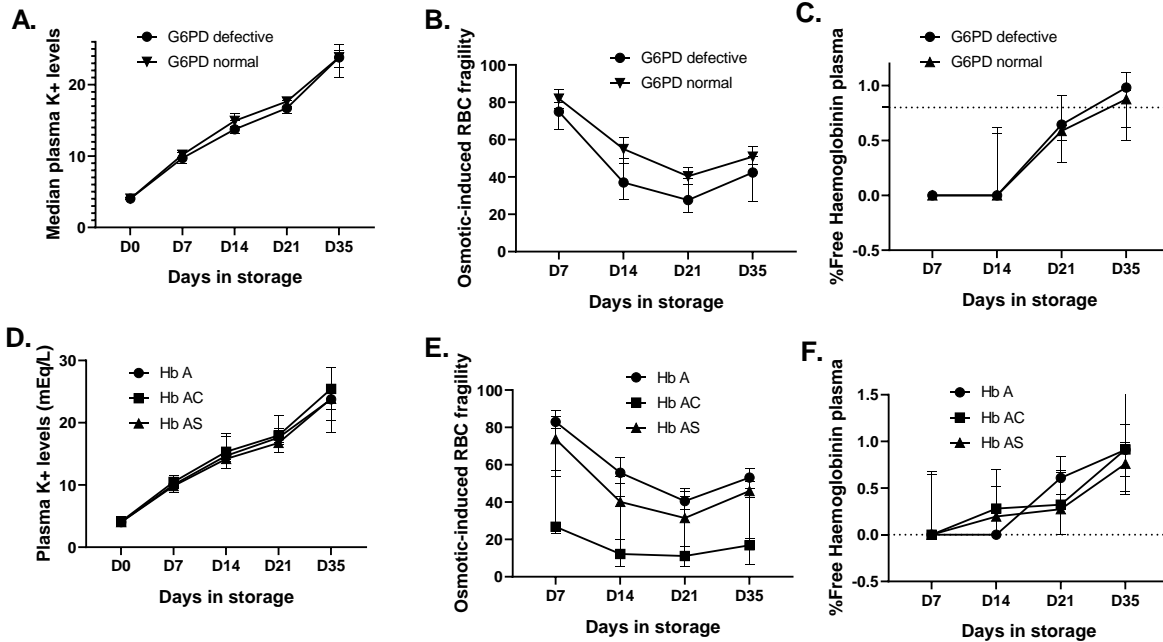

**Supplementary figure S1: Line graph showing the changes storage lesions with respect to days in storage.** Figures A, B, and C each depicts storage lesions quantified by changes in plasma potassium (A), osmotic-induced red cell fragility (B) and %free plasma haemoglobin (C) stratified per G6PD status of donated blood units. D, E and F each depicts storage lesions quantified by changes in plasma potassium (D), osmotic-induced red cell fragility (E) and %free plasma haemoglobin (F) stratified per inherited haemoglobin type of donated blood units. All figures are plotted using median with 95% confidence intervals.

### Supplementary file S2: Stratification of donor units based on %Hb F levels.

| Variable                           | Day   |         |         |         |         | P-value |
|------------------------------------|-------|---------|---------|---------|---------|---------|
|                                    | Day 0 | Day 7   | Day 14  | Day 21  | Day 35  |         |
| <b>Plasma K<sup>+</sup> levels</b> |       |         |         |         |         |         |
| %Hb F < 2.5                        | 4.050 | 10.110  | 14.200† | 17.600† | 23.990† | <0.0001 |
| %Hb F ≥ 2.5                        | 4.030 | 10.020† | 14.740† | 17.430† | 23.690† | <0.0001 |
| p-value                            | ns    | ns      | ns      | ns      | ns      |         |
| <b>Osmotic-induced lysis</b>       |       |         |         |         |         |         |
| %Hb F < 2.5                        | ND    | 79.770  | 40.260† | 28.390† | 48.340† | <0.0001 |
| %Hb F ≥ 2.5                        | ND    | 79.620  | 53.960† | 39.810† | 49.070† | <0.0001 |
| p-value                            |       | ns      | ns      | ns      | ns      |         |
| <b>Free haemoglobin</b>            |       |         |         |         |         |         |

|           |    |       |       |        |        |         |
|-----------|----|-------|-------|--------|--------|---------|
| %Hb F<2.5 | ND | 0.000 | 0.000 | 0.3990 | 0.901† | <0.0001 |
| %Hb F≥2.5 | ND | 0.000 | 0.000 | 0.619† | 0.857† | <0.0001 |
| p-value   |    | ns    | ns    | ns     | ns     |         |

Hb F = fetal haemoglobin; ND means not determined; ns means not significant; † indicates that median value significantly differed from day 0 (K+ levels), or day 7 (for osmotic fragility or %free haemoglobin); “ns” means not statistically significantly different; Statistical significance was estimated per each %Hb F category in relation to days of storage by means of Friedman’s repeated measure test with Dunn’s multiple correction; Across the two %Hb F stratification, statistical differences within each day was calculated using Mann-Whitney test.
